# Association study of tardive dyskinesia and twelve DRD2 polymorphisms in schizophrenia patients

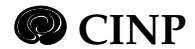

Clement C. Zai<sup>1,2</sup>, Rudi W. Hwang<sup>1,2</sup>, Vincenzo De Luca<sup>1,2</sup>, Daniel J. Müller<sup>1,3</sup>,  
Nicole King<sup>1</sup>, Gwyneth C. Zai<sup>1,2</sup>, Gary Remington<sup>1</sup>, Herbert Y. Meltzer<sup>4</sup>,  
Jeffrey A. Lieberman<sup>5</sup>, Steven G. Potkin<sup>6</sup> and James L. Kennedy<sup>1,2</sup>

<sup>1</sup> Centre for Addiction and Mental Health, Toronto, Ontario, Canada

<sup>2</sup> Institute of Medical Science, University of Toronto, Toronto, Ontario, Canada

<sup>3</sup> Department of Psychiatry, Charité University Medicine Berlin, Campus Charité Mitte, Berlin, Germany

<sup>4</sup> Psychiatric Hospital at Vanderbilt University, Nashville, TN, USA

<sup>5</sup> New York State Psychiatric Institute, Columbia University Medical Centre, New York City, NY, USA

<sup>6</sup> Brain Imaging Center, Irvine Hall, University of California at Irvine, CA, USA

## Abstract

Tardive dyskinesia (TD) is a side-effect of chronic antipsychotic medication. Abnormalities in dopaminergic activity in the nigrostriatal system have been most often suggested to be involved because the agents which cause TD share in common potent antagonism of dopamine D<sub>2</sub> receptors (DRD2), that notably is not balanced by effects such as more potent serotonin (5-HT)<sub>2A</sub> antagonism. Thus, a number of studies have focused on the association of dopamine system gene polymorphisms and TD. The most consistent findings have been found with the Ser9Gly polymorphism of the *DRD3* gene. Although DRD2 has long been hypothesized to be the main target for antipsychotics, only a few polymorphisms in DRD2 have been investigated for their potential involvement in the aetiology of TD. In the present study, we investigated 12 polymorphisms spanning the *DRD2* gene and their association with TD in our European Caucasian (*n*=202) and African-American (*n*=30) samples. Genotype frequencies for a functional polymorphism, C957T (Duan et al., 2003; Hirvonen et al., 2004), and the adjacent C939T polymorphism were found to be significantly associated with TD (*p*=0.013 and *p*=0.022 respectively). DRD2 genotypes were not significantly associated with TD severity as measured by AIMS (Abnormal Involuntary Movement Scale) with the exception of a trend for C939T (*p*=0.071). Both TD and total AIMS scores were found to be significantly associated with two-marker haplotypes containing C939T and C957T (*p*=0.021 and *p*=0.0087 respectively). Preliminary results indicated that C957T was also associated with TD in our African-American sample (*p*=0.047). Taken together, the present study suggests that DRD2 may be involved in TD in the Caucasian population, although further studies are warranted.

Received 3 March 2006; Reviewed 17 May 2006; Revised 23 June 2006; Accepted 4 July 2006;

First published online 7 September 2006

**Key words:** Abnormal Involuntary Movement Scale (AIMS), DRD2, genetics, schizophrenia, tardive dyskinesia.

## Introduction

Tardive dyskinesia (TD) is a potentially irreversible motor side-effect that develops in schizophrenia patients treated chronically with typical antipsychotic

drugs. It is characterized by involuntary choreo-athetotic movements mostly in the orofacial regions, with more severe cases involving the trunk as well as the upper and lower limbs. Its reported prevalence varies from 16% to 43%, with an annual incidence rate of around 5% (reviewed in Tarsy and Baldessarini, 2006). Patients with this condition often struggle with the immediate difficulties of motor function, but also with adhering to treatment, discrimination, and poorer quality of life (Gerlach, 2002; Marsalek, 2000),

Address for correspondence: Dr J. L. Kennedy, Centre for Addiction and Mental Health, 250 College Street, Room 30, Toronto, Ontario, Canada, M5T 1R8.

Tel.: 416-979-4987 Fax: 416-979-4666

E-mail: James\_Kennedy@camh.net

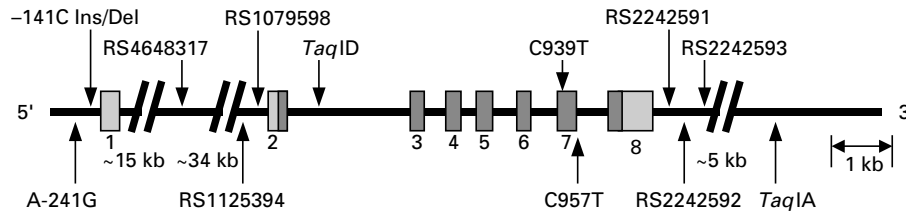

**Figure 1.** Schematic diagram of the *DRD2* gene with its exons and introns. The positions of the 12 polymorphisms used for the present study are indicated within the gene.

so predicting which patients are vulnerable to TD remains a high priority for psychiatrists in treatment selection.

The aetiology of TD is complex and remains unclear. Age, gender, and ethnicity are all suggested risk factors for TD. More specifically, Woerner and co-workers found that patients aged >50 yr were 3–5 times more likely to develop TD than younger patients in other studies (Kane et al., 1988; Morgenstern and Glazer, 1993; Woerner et al., 1998). A review of 13 studies found females to be more likely to develop TD with an odds ratio of 1.69 (Smith and Dunn, 1979), although other studies reported the opposite findings (Morgenstern et al., 1987; van Os et al., 1997). The difference was attributed to possible selection bias for more severe cases in the female gender group in earlier studies. Jeste and co-workers reported a yearly TD incidence of over 45% for African-Americans compared to 27% in Caucasians (Jeste et al., 2000), but socioeconomic factors could have contributed to their findings. Environmental risk factors such as smoking as well as alcohol and recreational drug use could further increase the risk for TD (Bailey et al., 1997; Menza et al., 1991; Oliveira et al., 1990). Concordance for the presence or absence of TD among first-degree relatives provided evidence for a genetic component of TD (Müller et al., 2001). A number of mechanisms leading to TD have been hypothesized, including GABA insufficiency (Casey, 2000), free radical-mediated neuronal injury (Andreasson and Jorgensen, 2000), and structural abnormalities in brain regions involved in motor function such as the caudate nucleus (Chakos et al., 1994; Corson et al., 1999). The best known hypothesis postulates TD as being caused by hypersensitivity of dopamine receptors induced by dopamine receptor-blocking medication including antipsychotics (Abilio et al., 2003; Gerlach and Casey, 1988; Klawans et al., 1980; Tarsy and Baldessarini, 1977). This hypothesis is based on several observations. Persistent dyskinesia was induced by neuroleptic treatment in a non-human primate model of TD with significantly decreased dopamine turnover in

the caudate and substantia nigra (Gunne et al., 1984). The dopamine  $D_2$  receptor is most densely expressed in the basal ganglia, an area of the central nervous system that regulates movements (Hall et al., 1994). Moreover, clinical studies (Beasley et al., 1999; Jeste et al., 1999a,b; Kane et al., 1993) and rodent vacuous chewing TD models (Gao et al., 1998; Johansson et al., 1986) have revealed that compared to atypical antipsychotics, TD is more likely to develop after treatment with typical antipsychotics that generally have higher affinities for  $D_2$  given by in-vitro competition assays (Schwartz et al., 2000). Some antipsychotic drugs that have high affinities for  $D_2$  have a lower risk of causing TD, e.g. olanzapine, risperidone and ziprasidone. This appears to be due to these drugs also being more potent 5-HT<sub>2A</sub> antagonists (Meltzer et al., 2003). Thus, variation in  $D_2$  function and expression may contribute to the risk of TD development.

The dopamine  $D_2$  receptor belongs to the G-protein-coupled receptor family. It activates intracellular signalling by inhibiting the synthesis of cAMP. *DRD2*, the  $D_2$ -encoding gene, consists of eight exons and spans ~65 kb (Figure 1). Several in-vivo and in-vitro studies have focused on the effect that *DRD2* polymorphisms have on  $D_2$  expression. The -141C Del allele has been reported to decrease *DRD2* promoter activity in vitro (Arinami et al., 1997), while one in-vivo study showed that the Del allele is associated with an increase in striatal  $D_2$  binding (Jönsson et al., 1999a); however, another in-vivo study reported no significant difference (Ritchie and Noble, 2003). The B1 allele in intron 1 has been associated with decreased  $D_2$  binding in vivo (Jönsson et al., 1999a; Ritchie and Noble, 2003), as has T957 (Hirvonen et al., 2004). The latter has also been reported to decrease *DRD2* mRNA stability in vitro (Duan et al., 2003). The *TaqIA* polymorphism has received much attention recently as it was discovered to reside in an overlapping gene, *ANKK1*, and cause a non-synonymous coding polymorphism (Neville et al., 2004). The A1 allele has been associated with reduced  $D_2$  levels in several studies (Jönsson et al., 1999a; Noble et al., 1991; Pohjalainen

et al., 1998; Ritchie and Noble, 2003; Thompson et al., 1997). Laruelle and co-workers (1998), however, did not find a significant association between *TaqIA* and  $D_2$  expression levels, but this negative finding could be the result of population stratification as subjects with four different ethnic backgrounds were included.

*DRD2* has been previously associated with schizophrenia. Several polymorphisms, including the -141C Ins, A2, and B2 variants, as well as their haplotypes, have been reported to be positively associated or over-transmitted in various schizophrenia samples (Arinami et al., 1997; Breen et al., 1999; Dubertret et al., 2001; Golimbet et al., 1998; Inada et al., 1999; Jönsson et al., 1999b). However, other investigators did not replicate the findings, suggesting that further studies are required (Arranz et al., 1998; Hori et al., 2001a; Stober et al., 1998; Suzuki et al., 2000; Tallerico et al., 1999). *DRD2* is one of the first genes to be tested in TD genetic studies. In all, ten studies have been conducted on *DRD2* and TD. Specifically, the A-241G, -141C Ins/Del, *TaqIB*, *TaqID*, C939T, and *TaqIA* polymorphisms have been analysed for association with TD (Chen et al., 1997; Chong et al., 2003; de Leon et al., 2005; Hori et al., 2001b; Inada et al., 1997, 1999; Kaiser et al., 2002; Lattuada et al., 2004; Segman et al., 2003; Srivastava et al., 2006). Chen et al. (1997) initially detected an association between the *TaqIA* marker and TD particularly in female schizophrenia patients. However, the *DRD2* association with TD could not be replicated in most other studies.

In the present study, we tested for the presence of an association between the *DRD2* gene and TD using both continuous [Abnormal Involuntary Movement Scale (AIMS)] and dichotomous (TD occurrence) measures in relatively large samples of Caucasian and African-American patients with schizophrenia using 12 polymorphisms spanning the *DRD2* gene: A-241G, -141C Ins/Del, *TaqID*, C939T, C957T, *TaqIA*, rs4648317, rs1125394, rs1079598, rs2242591, rs2242592, and rs2242593 all of which have recently been used in a detailed analysis of *DRD2* in clozapine response (Hwang et al., 2005).

## Patients and methods

### Subjects

Subjects were recruited from four clinical sites in North America: the Center for Addiction and Mental Health in Toronto, Ontario (Dr G. Remington,  $n=94$ ); Case Western Reserve University in Cleveland, Ohio (Dr H. Y. Meltzer,  $n=77$ ); Hillside Hospital in Glen

Oaks, New York (Dr J. A. Lieberman,  $n=49$ ), and University of California at Irvine, California (Dr S. G. Potkin,  $n=12$ ). Subjects were selected based on their diagnoses of schizophrenia or schizoaffective disorder according to DSM-III-R or DSM-IV (APA, 1994). All patients had undergone cumulatively at least 1 yr of treatment with typical antipsychotics. For the Meltzer, Lieberman, and Potkin samples, the presence or absence of TD was evaluated before any atypical antipsychotic administration, while patients were on mixed typical and atypical antipsychotics when TD was evaluated in the Remington sample. The presence of TD was assessed using AIMS or the modified Hillside Simpson Dyskinesia Scale (HSDS) for 49 patients recruited from the Hillside Hospital (Basile et al., 1999; Guy, 1976; Schooler and Kane, 1982). The seven body area items and the overall global item of HSDS match those of AIMS, thus the assessment for the presence of TD was the equivalent for all four sites. All four clinicians (G.R., H.Y.M., J.A.L., S.G.P.) are highly experienced in TD severity measurements of which the consistency was further enhanced by exchange visits across sites.

In all, 232 patients were studied. Of these, 202 were European Caucasians, of which 80 were positive for the occurrence of TD. The remaining 30 were African-Americans, of which 11 were TD-positive. AIMS scores were available for 197 patients (171 Caucasians and 26 African-Americans). Because of small sample size, the African-Americans were only used in the test for allele frequency association with TD.

### Gene polymorphism analysis

Genomic DNA was purified from whole blood samples using the high-salt method previously described (Lahiri and Nurnburger, 1991). Polymerase chain reactions (10  $\mu$ l) on 20 ng genomic DNA were performed using TaqMan allele-specific assays with the following conditions: 95 °C for 10 min, followed by 50 cycles of 92 °C for 15 s, and 60 °C for 1 min. Genotyping was done after the subjects completed the follow-up in which all laboratory staff were blind to the AIMS scores. The A-241G, -141C Ins/Del, *TaqID*, C939T, and *TaqIA* polymorphisms have been used in previous TD studies. The C957T polymorphism was studied because of its functional significance and its high minor allele frequency (Duan et al., 2003; Hirvonen et al., 2004). The remaining polymorphisms, rs4648317, rs1125394, rs1079598, rs2242591, rs2242592, and rs2242593, were selected based on their position within the *DRD2* gene and the

presence of sufficiently high minor allele frequencies (Hwang et al., 2005). The assays with their corresponding polymorphisms and locations are shown in Figure 1. Genotypes were determined using the ABI Prism® 7000 Sequence Detection System with the allelic discrimination program within the ABI software (Applied Biosystems, Foster City, CA, USA). All ambiguous genotypes were retyped, and if they remained ambiguous, they were taken out of the analysis.

### Statistics

Statistical analyses were conducted using the Statistical Package for the Social Sciences version 10.0.7, Haploview version 3.2, and UNPHASED version 2.402 (Barrett et al., 2005; Dudbridge, 2003; Hwang et al., 2005; SPSS, 2000). Odds ratio calculations were conducted using program 2BY2 version 2 written by Jurg Ott. Genotype frequency distribution was tested for fitness to Hardy–Weinberg equilibrium using Haploview. The association of genotype frequencies with age and AIMS scores was assessed using ANOVA, and where the variances of AIMS scores among genotypes differed significantly using the Levene Test for Homogeneity of Variance, AIMS scores were examined with the Kruskal–Wallis test on SPSS. Gender differences in genotype frequencies were assessed using the  $\chi^2$  test on SPSS. The differences in allele and genotype frequencies between patients with and without TD were analysed by  $\chi^2$  test. For contingency tables with at least one expected cell count of  $<5$ , two-tailed Fisher's exact tests were performed (<http://home.clara.net/sisa/fiveby2.htm>). Haplotype analyses and linkage disequilibrium calculations were conducted using UNPHASED and Haploview respectively.

### Ethical considerations

The scientific work described in the present paper complies with the current laws of Canada and the USA, as well as the ethical standards established in the 1964 Declaration of Helsinki. Informed consent was obtained before subjects' participation, and this study was approved by the Ethics Committee of the Centre for Addiction and Mental Health.

## Results

### Sample characteristics

The genotype distributions of all the *DRD2* gene polymorphisms in the European Caucasian samples did not differ significantly from Hardy–Weinberg

equilibrium ( $p > 0.10$ ). RS1125394 was found not to be in Hardy–Weinberg equilibrium in our African–American sample ( $p < 0.01$ ). A significant increase in frequency of TD was found in females ( $p = 0.009$ ), while no significant association was found between gender and genotype frequencies (Table 1). We also found a significant positive correlation between AIMS scores and age ( $r = 0.206$ ,  $p = 0.007$ ).

### Association study of individual polymorphisms with TD occurrence and AIMS

With our Caucasian sample, we found the C957T allele frequencies to be significantly associated with TD occurrence ( $p = 0.014$ ). Specifically, the T957 allele appears to be under-represented in TD-positive patients compared to TD-negative patients ( $OR_{T957}$  0.59, 95% CI 0.39–0.90; Table 2). We also found a significant association for the C939 allele that appears to be present in a lower proportion of TD-positive patients compared to TD-negative patients ( $p = 0.0085$ ,  $OR_{C939}$  0.56, 95% CI 0.36–0.86; Table 2). The genotype frequencies of the C957T and C939T polymorphisms were also found to be significantly associated with TD ( $p = 0.013$ ,  $OR_{TT957}$  0.30, 95% CI 0.13–0.69;  $p = 0.022$ ,  $OR_{CC939}$  0.42, 95% CI 0.23–0.79; Table 1). We further tested for differences in average AIMS scores among genotypes with ANOVA. C957T and C939T showed the same trend as for TD analyses, with the differences being suggestive for C939T ( $p = 0.150$  and  $p = 0.071$  respectively; Table 1). Upon close inspection with Student's *t* tests, we found patients homozygous for C939 to have significantly lower total AIMS scores than patients carrying at least one copy of T939 ( $p = 0.001$ ). Patients homozygous for T957 had significantly lower total AIMS scores than patients carrying at least one copy of C957 ( $p = 0.044$ ). RS2242592 also showed significant or suggestive association with TD at the allelic and genotypic levels. The RS2242592 findings could be due to generally high linkage disequilibrium observed in the 3' region of *DRD2* (Figure 2). The other polymorphisms analysed did not show significant associations with TD either for allele, genotype, or AIMS scores analyses.

### Association study of haplotypes with TD diagnosis and AIMS

Using the Haploview program with linkage disequilibrium block defined by Gabriel et al. (2002), strong evidence for linkage was found between C939T and C957T, prompting us to test for association between TD and two-marker haplotypes across *DRD2* (Figure 2). RS2242593 and *TaqIA* were also found to be

**Table 1.** Statistical analyses on demographics (sex, age) as well as total AIMS scores and TD diagnoses with genotypes of the 12 polymorphisms in *DRD2*

| DRD2 markers  |               | n (F/M)      | Age (yr)          | Total AIMS<br>score $\pm$ S.D. (n) | TD           |     |
|---------------|---------------|--------------|-------------------|------------------------------------|--------------|-----|
|               |               |              |                   |                                    | Yes          | No  |
| A-241G        | 1/1 (A/A)     | 161 (54/107) | 37.71 $\pm$ 9.46  | 5.53 $\pm$ 7.18 (131)              | 59           | 102 |
|               | 1/2 (A/G)     | 28 (8/20)    | 37.25 $\pm$ 11.72 | 7.56 $\pm$ 8.75 (27)               | 12           | 16  |
|               | <i>p</i>      | 0.605        | 0.820             | 0.200                              | 0.531        |     |
| -141C Ins/Del | 1/1 (Del/Del) | 2 (1/1)      | 38.00 $\pm$ 1.41  | 6.50 $\pm$ 6.36 (2)                | 1            | 1   |
|               | 1/2 (Ins/Del) | 32 (10/22)   | 39.06 $\pm$ 10.76 | 5.71 $\pm$ 7.84 (28)               | 14           | 18  |
|               | 2/2 (Ins/Ins) | 150 (49/101) | 37.14 $\pm$ 9.76  | 5.66 $\pm$ 7.20 (123)              | 54           | 96  |
|               | <i>p</i>      | 0.927*       | 0.608             | 0.987                              | 0.554*       |     |
| RS4648317     | 1/1 (C/C)     | 143 (51/92)  | 37.83 $\pm$ 10.16 | 5.78 $\pm$ 7.21 (124)              | 56           | 87  |
|               | 1/2 (C/T)     | 38 (8/30)    | 37.92 $\pm$ 8.56  | 5.32 $\pm$ 7.61 (28)               | 12           | 26  |
|               | 2/2 (T/T)     | 4 (2/2)      | 26.25 $\pm$ 4.35  | 5.00 $\pm$ 7.07 (2)                | 2            | 2   |
|               | <i>p</i>      | 0.144*       | <b>0.066</b>      | 0.947                              | 0.581*       |     |
| RS1125394     | 1/1 (A/A)     | 135 (42/93)  | 37.76 $\pm$ 10.36 | 6.34 $\pm$ 8.04 (116)              | 52           | 83  |
|               | 1/2 (A/G)     | 49 (17/32)   | 38.31 $\pm$ 8.55  | 4.97 $\pm$ 5.89 (38)               | 18           | 31  |
|               | 2/2 (G/G)     | 6 (2/4)      | 39.50 $\pm$ 10.56 | 5.60 $\pm$ 6.69 (5)                | 4            | 2   |
|               | <i>p</i>      | 0.907*       | 0.878             | 0.988†                             | 0.372*       |     |
| RS1079598     | 1/1 (C/C)     | 6 (3/3)      | 36.33 $\pm$ 11.73 | 6.20 $\pm$ 6.65 (5)                | 4            | 2   |
|               | 1/2 (C/T)     | 48 (16/32)   | 38.83 $\pm$ 8.52  | 4.74 $\pm$ 5.88 (39)               | 16           | 32  |
|               | 2/2 (T/T)     | 138 (45/94)  | 37.34 $\pm$ 10.33 | 6.34 $\pm$ 7.96 (118)              | 55           | 84  |
|               | <i>p</i>      | 0.684*       | 0.632             | 0.514†                             | 0.277*       |     |
| TaqID         | 1/1 (C/C)     | 50 (15/35)   | 37.42 $\pm$ 9.35  | 6.31 $\pm$ 8.00 (45)               | 20           | 30  |
|               | 1/2 (C/T)     | 83 (30/53)   | 37.43 $\pm$ 9.89  | 5.22 $\pm$ 6.44 (64)               | 33           | 50  |
|               | 2/2 (T/T)     | 56 (15/41)   | 37.21 $\pm$ 10.30 | 6.16 $\pm$ 8.34 (49)               | 17           | 39  |
|               | <i>p</i>      | 0.485        | 0.991             | 0.946†                             | 0.467        |     |
| C939T         | 1/1 (C/C)     | 80 (27/53)   | 37.51 $\pm$ 8.69  | 3.80 $\pm$ 4.91 (69)               | 21           | 59  |
|               | 1/2 (C/T)     | 85 (29/56)   | 38.08 $\pm$ 9.78  | 6.69 $\pm$ 7.46 (68)               | 38           | 47  |
|               | 2/2 (T/T)     | 22 (5/17)    | 34.36 $\pm$ 11.21 | 9.85 $\pm$ 11.77 (20)              | 11           | 11  |
|               | <i>p</i>      | 0.573        | 0.263             | <b>0.071†</b>                      | <b>0.022</b> |     |
| C957T         | 1/1 (C/C)     | 44 (10/34)   | 36.59 $\pm$ 10.94 | 7.29 $\pm$ 9.42 (38)               | 20           | 24  |
|               | 1/2 (C/T)     | 102 (38/64)  | 38.21 $\pm$ 9.32  | 5.84 $\pm$ 6.62 (82)               | 43           | 59  |
|               | 2/2 (T/T)     | 43 (14/29)   | 37.95 $\pm$ 9.09  | 3.89 $\pm$ 5.86 (38)               | 8            | 35  |
|               | <i>p</i>      | 0.229        | 0.646             | 0.150†                             | <b>0.013</b> |     |
| RS2242591     | 1/1 (A/A)     | 126 (40/86)  | 37.49 $\pm$ 10.32 | 6.14 $\pm$ 8.06 (107)              | 46           | 80  |
|               | 1/2 (A/G)     | 51 (16/35)   | 37.45 $\pm$ 8.53  | 5.03 $\pm$ 5.99 (40)               | 18           | 33  |
|               | 2/2 (G/G)     | 8 (4/4)      | 38.50 $\pm$ 11.16 | 5.14 $\pm$ 5.90 (7)                | 5            | 3   |
|               | <i>p</i>      | 0.602*       | 0.960             | 0.705                              | 0.357*       |     |
| RS2242592     | 1/1 (C/C)     | 17 (3/14)    | 35.18 $\pm$ 12.60 | 7.44 $\pm$ 10.36 (16)              | 8            | 9   |
|               | 1/2 (C/T)     | 89 (31/58)   | 37.69 $\pm$ 9.80  | 6.99 $\pm$ 7.94 (72)               | 40           | 49  |
|               | 2/2 (T/T)     | 79 (29/54)   | 38.02 $\pm$ 9.08  | 4.37 $\pm$ 5.85 (70)               | 24           | 59  |
|               | <i>p</i>      | 0.355        | 0.547             | 0.135†                             | <b>0.070</b> |     |
| RS2242593     | 1/1 (A/A)     | 131 (42/89)  | 37.63 $\pm$ 10.23 | 6.05 $\pm$ 7.97 (111)              | 47           | 84  |
|               | 1/2 (A/G)     | 50 (15/35)   | 37.98 $\pm$ 8.71  | 5.27 $\pm$ 5.92 (40)               | 20           | 30  |
|               | 2/2 (G/G)     | 6 (3/3)      | 36.33 $\pm$ 11.73 | 6.20 $\pm$ 6.65 (5)                | 4            | 2   |
|               | <i>p</i>      | 0.588*       | 0.923             | 0.842                              | 0.291*       |     |
| TaqIA         | 1/1 (T/T)     | 6 (2/4)      | 38.33 $\pm$ 10.35 | 6.12 $\pm$ 8.16 (5)                | 3            | 3   |
|               | 1/2 (C/T)     | 72 (27/45)   | 38.47 $\pm$ 9.07  | 4.93 $\pm$ 5.88 (60)               | 25           | 47  |
|               | 2/2 (C/C)     | 111 (32/79)  | 36.63 $\pm$ 10.38 | 5.20 $\pm$ 6.87 (93)               | 40           | 71  |
|               | <i>p</i>      | 0.446*       | 0.458             | 0.960†                             | 0.781*       |     |

\* With at least one expected cell count  $< 5$ ; Fisher's exact test used.

† Variances among comparisons groups differ significantly; Kruskal–Wallis test used.

Bold values indicate  $0.05 < p < 0.10$ . Bold italic values indicate  $p < 0.05$ .

**Table 2.** Results from  $\chi^2$  test of allele frequencies of each of the 12 polymorphisms vs. TD diagnoses for both Caucasian and African-American populations

| DRD2 markers  |                   | TD            |        |                  |    |
|---------------|-------------------|---------------|--------|------------------|----|
|               |                   | Caucasian     |        | African-American |    |
|               |                   | Yes           | No     | Yes              | No |
| A-241G        | Allele 1 (A)      | 130           | 220    | 15               | 33 |
|               | Allele 2 (G)      | 12            | 16     | 7                | 5  |
|               | <i>p</i>          | 0.548         |        | 0.102*           |    |
| -141C Ins/Del | Allele 1 (Del/C)  | 16            | 20     | 9                | 16 |
|               | Allele 2 (Ins/CC) | 122           | 210    | 13               | 22 |
|               | <i>p</i>          | 0.365         |        | 0.928            |    |
| RS4648317     | Allele 1 (C)      | 124           | 200    | 19               | 34 |
|               | Allele 2 (T)      | 16            | 30     | 3                | 4  |
|               | <i>p</i>          | 0.648         |        | 0.700*           |    |
| RS1125394     | Allele 1 (A)      | 122           | 197    | 19               | 37 |
|               | Allele 2 (G)      | 26            | 35     | 3                | 1  |
|               | <i>p</i>          | 0.521         |        | 0.135*           |    |
| RS1079598     | Allele 1 (C)      | 24            | 36     | 2                | 0  |
|               | Allele 2 (T)      | 126           | 200    | 20               | 38 |
|               | <i>p</i>          | 0.844         |        | 0.131*           |    |
| TaqID         | Allele 1 (C)      | 73            | 110    | 13               | 18 |
|               | Allele 2 (T)      | 67            | 128    | 9                | 20 |
|               | <i>p</i>          | 0.266         |        | 0.381            |    |
| C939T         | Allele 1 (C)      | 80            | 165    | 6                | 14 |
|               | Allele 2 (T)      | 60            | 69     | 16               | 24 |
|               | <i>p</i>          | <b>0.0085</b> |        | 0.449            |    |
| C957T         | Allele 1 (C)      | 83            | 107    | 20               | 26 |
|               | Allele 2 (T)      | 59            | 129    | 2                | 12 |
|               | <i>p</i>          | <b>0.0135</b> |        | <b>0.0472</b>    |    |
| RS2242591     | Allele 1 (A)      | 110           | 193    | 20               | 34 |
|               | Allele 2 (G)      | 28            | 39     | 2                | 4  |
|               | <i>p</i>          | 0.401         |        | 1.000*           |    |
| RS2242592     | Allele 1 (C)      | 56            | 67     | 14               | 20 |
|               | Allele 2 (T)      | 88            | 167    | 8                | 18 |
|               | <i>p</i>          | <b>0.039</b>  |        | 0.687            |    |
| RS2242593     | Allele 1 (A)      | 114           | 198    | 21               | 37 |
|               | Allele 2 (G)      | 28            | 34     | 1                | 1  |
|               | <i>p</i>          | 0.201         | 1.000* |                  |    |
| TaqIA         | Allele 1 (C)      | 31            | 53     | 4                | 8  |
|               | Allele 2 (T)      | 105           | 189    | 18               | 30 |
|               | <i>p</i>          | 0.841         |        | 1.000*           |    |

\* With at least one expected cell count &lt;5. Fisher's exact test was used.

Bold italic values indicate  $p < 0.05$ .

in linkage disequilibrium in our sample. COCAPHASE analysis within UNPHASED revealed an association for the C939T–C957T haplotype and TD diagnosis (global  $p = 0.021$ ; Table 3). Specifically, the C939–T957 haplotype appeared to occur less often while the T939–C957

haplotype appeared more frequently in TD-positive patients ( $p = 0.007$ ,  $OR_{C939-T957} = 0.56$ , 95% CI 0.37–0.86;  $p = 0.013$ ,  $OR_{T939-C957} = 1.72$ , 95% CI 1.11–2.65, respectively). QTPHASE analysis within the UNPHASED program using two-marker haplotypes also showed significant

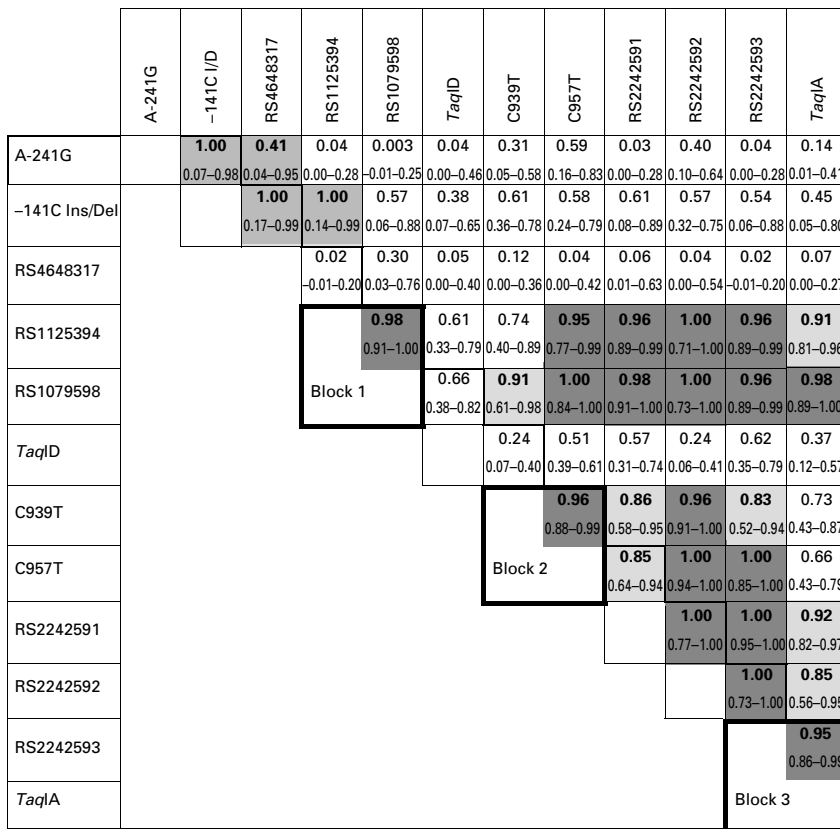

**Figure 2.** Linkage disequilibrium plot among the 12 DRD2 gene polymorphisms used in the present study. The figures represents  $D'$  values and the 95% confidence intervals of  $D'$ , while the colour darkness within each box corresponds to strength of linkage. The blocks (1, 2, and 3) encompass areas with highest linkage disequilibrium given by  $D' > 0.90$  and lower boundary of the 95% confidence intervals of  $D' > 0.70$  (Gabriel et al., 2002).

**Table 3.** Global  $p$  values from analyses of two-marker haplotypes in association to TD and AIMS using COCAPHASE and QTPHASE programs respectively. Haplotypes with frequencies of  $< 0.05$  were excluded from the analyses

| Haplotype           | $p$ value<br>(TD±) | $p$ value<br>(AIMS) |
|---------------------|--------------------|---------------------|
| A-241G- -141C I/D   | 0.358              | 0.326               |
| -141C I/D-RS4648317 | 0.616              | 0.924               |
| RS4648317-RS1125394 | 0.771              | 0.726               |
| RS1125394-RS1079598 | 0.869              | 0.362               |
| RS1079598-TaqID     | 0.423              | 0.609               |
| TaqID-C939T         | <b>0.0569</b>      | <b>0.00655</b>      |
| C939T-C957T         | <b>0.0206</b>      | <b>0.00868</b>      |
| C957T-RS2242591     | <b>0.0339</b>      | <b>0.0628</b>       |
| RS2242591-RS2242592 | <b>0.0341</b>      | 0.131               |
| RS2242592-RS2242593 | <b>0.0148</b>      | 0.122               |
| RS2242593-TaqIA     | 0.536              | 0.629               |

Bold values indicate  $0.05 < p < 0.10$ ; bold italic values indicate  $p < 0.05$ .

association of haplotypes containing C957T and C939T polymorphisms with AIMS scores ( $p = 0.0087$ , Table 3). Patients carrying the C939-T957 haplotype had significantly lower average AIMS scores than other haplotypes, while those carrying the T939-C957 had significantly higher average AIMS scores ( $p = 0.017$  and  $p = 0.0013$  respectively).

For the African-American sample, preliminary results indicated a marginally significant association between TD and alleles of the C957T ( $p = 0.047$ ), with the T957 allele appearing to be protective ( $OR_{T957} = 0.22$ , CI 0.04-1.08). The linkage disequilibrium chart showing  $D'$  values calculated using TD status on the 12 polymorphisms is provided as a reference in designing future genetic studies (Figure 2).

## Discussion

Previous studies yielded conflicting results with regard to the DRD2 gene and TD. Besides the positive findings by Chen et al. (1997), only a few others

have found a significant association using *DRD2* polymorphisms. There are several reasons for these mixed results. First, different polymorphisms were used in many of the studies, and in most cases only a few polymorphisms were tested without haplotype analyses. Only Kaiser et al. (2002) analysed nine polymorphisms spanning the entire 65-kb-long *DRD2* gene. Second, populations with different ethnic backgrounds were used in the studies, making findings difficult to compare due to potentially undetected stratification effects. Further, in some studies, the sample sizes were small, limiting the power to detect an association. Finally, many studies did not take into account statistical advantages of the continuous AIMS scores and only used the dichotomous TD occurrence for the analyses. The aim of our study has been to investigate 12 *DRD2* gene polymorphisms for genetic association with TD in a relatively large sample involving haplotype analyses.

Results from the present study are consistent with most previous studies in that the A-241G, -141C Ins/Del, *TaqID*, and *TaqIA* polymorphisms were found to be not significantly associated with TD. The previous positive finding with *TaqIA* could be due to higher linkage disequilibrium in the 3' portion of *DRD2* as shown in our sample and others (Figure 2; Kaiser et al., 2002; Ritchie and Noble, 2003), and that the causative variant may reside within *DRD2*. Indeed, we found a significant association between TD and the C957T polymorphism as well as its neighbouring C939T polymorphism in our Caucasian sample. To our knowledge, the C957T polymorphism has not been investigated previously for its effect on TD. Although the polymorphism does not affect the amino-acid sequence, the T variant has been associated with decreased striatal *DRD2* levels in vivo and decreased *DRD2* mRNA stability in vitro (Duan et al., 2003; Hirvonen et al., 2004). Using MFOLD, Duan and co-workers showed that the predicted mRNA folding structures were different between the two alleles (Duan et al., 2003). They hypothesized that T957 may decrease *DRD2* expression through its effect on *D<sub>2</sub>* mRNA secondary structure. The change in secondary structure may affect binding of mRNA-stabilizing proteins at the 5'-cap and 3'-poly(A) as well as translation initiation factors, thus decreasing both translation efficiency and mRNA half-life (Duan et al., 2003; Perkins et al., 2005). An under-representation of the T allele in patients with TD and a decrease in TD severity in T-allele carriers suggest that decreased *DRD2* levels may decrease TD susceptibility and severity. Our present study also reported a positive association with the nearby C939T, a polymorphism

not found to be associated with TD in a previous study on a Japanese sample (Inada et al., 1997). It is possible, though, that TD susceptibility and risk factors may be different among different ethnic groups. Ethnic differences were reflected by findings in our African-American sample, in which a significant association was only detected between C957T alleles and TD.

TD occurrence and severity were found to increase with age in the current sample, supporting previous studies from our laboratory and others (Basile et al., 1999; Jeste, 2000; Kaiser et al., 2002; van Os et al., 1997). Age and gender were unlikely to be responsible for the positive findings in this study, because mean age and gender proportions did not differ significantly among the genotypes of C939T and C957T.

Since both C939T and C957T are located in exon 7, it is possible that they are linked to a region that affects splicing around exon 6, resulting in a different ratio of the long (*D<sub>2</sub>L*) and short (*D<sub>2</sub>S*) isoforms. The two isoforms have distinct functions in vivo, and only the post-synaptic *D<sub>2</sub>L* isoform appears to be a major target of haloperidol (Centonze et al., 2004; Usiello et al., 2000). Thus, splicing changes could have contributed to changes in *DRD2* function, expression levels and patterns, affecting antipsychotic response and adverse effects. Understanding the mechanisms that regulate splicing of the *DRD2* gene will help answer the question of the locations of polymorphisms in the *DRD2* gene that affect the splicing efficiency. From the epigenetics standpoint, the C957T polymorphism may have arisen from deamination of methylated C957 to T957. Although C957T has been reported to regulate *D<sub>2</sub>* expression through its effect on mRNA stability, it is possible that C957 could be methylated in a subset of individuals. Methylated C957 may be functionally different from unmethylated C957 at the DNA level, thus opening another dimension of regulation of *D<sub>2</sub>* expression and function. This may also be the case for other polymorphisms in *DRD2*, especially in the promoter region where methylation has been reported (Popendikyte et al., 1999). Because association studies of *DRD2* have not considered CpG methylation and genetic polymorphisms do not capture the variability of regional CpG methylation (Flanagan et al., 2006), it may have given rise to the mixed results in previous findings. Understanding the role of epigenetics in the regulation of gene expression will help resolve at least some of the variability of results from genetics studies.

The present study encourages further examinations into C957T, C939T, as well as adjacent polymorphisms and TD, but it has several limitations. First, not



all clinical data were available for our study. These include medication history such as antipsychotic dose and duration, schizophrenia disease history including age of onset, clinical subtypes, psychopathology, and comorbidities. These factors or variables have been previously associated with TD (reviewed in Müller et al., 2004). Medications taken by patients for other adverse effects such as parkinsonism could have masked the TD phenotype (Egan et al., 1997; Glazer, 2000; Shale and Tanner, 1996). Moreover, we did not have information on tobacco, alcohol, or substance use for our entire sample. Further, our sample was drawn from four different clinical sites. Even though the study Caucasian population was in Hardy–Weinberg equilibrium for all 12 polymorphisms and the gender ratios among the four geographical groups do not differ significantly ( $p=0.165$ ), the mean ages differ significantly among them ( $p<0.001$ ). Therefore, the possibility of ascertainment bias cannot be ignored. About half of the present sample had been analysed previously for other genes with TD, with DRD3 findings being replicated (Bakker et al., 2006; Basile et al., 1999; Lerer et al., 2002). The other half of the sample has not been published previously for TD. Nonetheless, when the two halves were analysed separately, the trend remained for C939T and C957T (data not shown). Also, heterogeneity of the TD phenotype could have confounding effects; only total AIMS scores, but not the subscores, were available for most of our sample for genetic analyses, preventing further dissection of the phenotype. Finally, the marginally significant association could be due to the possibility that the polymorphisms have only a small contributing effect to the risk for TD as expected in complex phenotypes. The sample size in the current study was not large enough to provide sufficient power to detect a significant difference in AIMS scores between the genotypes. False-positive results from multiple testing are possible; indeed, if we corrected for multiple testing taking linkage disequilibrium into account using the online SNPSpD program, the significance threshold ( $\alpha$ ) in order to keep the Type I error rate at 5% would have become 0.005 (Nyholt, 2004). As a result, only our findings from haplotype analyses would have remained statistically significant. Larger sample sizes are required to detect small effects of genotypes on TD risk and severity, especially for our African–American sample where we did not detect significant associations between TD and any DRD2 polymorphisms after correction for multiple testing. With  $\alpha$  set at 0.005, the Caucasian portion of the sample used for the present study has only 18% power to detect the differences in AIMS scores

observed among the C939T genotypes (Glantz, 1992). To detect such differences, a sample size of at least 120 per genotype group will be needed for future studies.

The DRD2 gene is probably not the only genetically determined factor for TD, as other genes have been associated with TD as well. Genetic studies have identified DRD3 to be reproducibly associated with TD (Basile et al., 1999; Garcia-Barcelo et al., 2001; Lerer et al., 2002; Liao et al., 2001; Lovlie et al., 2000; Segman et al., 1999; Steen et al., 1997). Studies in other genes such as HTR2A, HTR2C, CYP1A2, and manganese superoxide dismutase require further investigation (Basile et al., 2001; Hori et al., 2000; Schulze et al., 2001; Segman et al., 2000, 2001; Tan et al., 2001). As nearly all antipsychotics target more than one receptor, it is likely that TD is not related to one receptor gene, but rather it is a polygenic condition with each gene contributing a small proportion of the risk to the disorder. Gene–gene interaction studies may help in identifying and clarifying pathways that contribute to TD. TD risk is also likely to be influenced by several environmental factors (Müller et al., 2004), and acquiring this information will help immensely in increasing the statistical power and limiting the effects of potential confounders in genetic studies of TD.

### Acknowledgements

This study was supported by grants from the National Institutes of Health, Canadian Institutes of Health Research, American Foundation for Suicide Prevention, Ritter Foundation, Prentiss Foundation and William K. Warren Foundation. We thank Dr Arturas Petronis for helpful comments on the manuscript.

### Statement of Interest

None.

### References

- Abilio VC, Vera Jr. JAR, Ferreira LSM, Duarte CRM, Martins CR, Torres-Leite D, Ribeiro RdeA, Frussa-Filho R (2003). Effects of melatonin on behavioral dopaminergic supersensitivity. *Life Sciences* 72, 3003–3015.
- Andreasson OA, Jorgensen HA (2000). Neurotoxicity associated with neuroleptic-induced oral dyskinesia in rats: implications for tardive dyskinesia? *Progress in Neurobiology* 61, 525–541.
- APA (1994). *Diagnostic and Statistical Manual of Mental Disorders* (4th edn). Washington, DC: American Psychiatric Association.

- Arinami T, Gao M, Hamaguchi H, Toru M (1997). A functional polymorphism in the promoter region of the dopamine D2 receptor gene is associated with schizophrenia. *Human Molecular Genetics* 6, 577–582.
- Arranz MJ, Munro J, Li T, Collier DA, Kirov G, Kerwin RW (1998). A polymorphism in the promoter region of the dopamine D2 receptor gene (DRD2) and drug response: association studies. *Schizophrenia Research* 29, 127.
- Bailey LG, Maxwell S, Brandabur MM (1997). Substance abuse as a risk factor for tardive dyskinesia: a retrospective analysis of 1,027 patients. *Psychopharmacology Bulletin* 33, 177–181.
- Bakker PR, van Harten PN, van Os J (2006). Antipsychotic-induced tardive dyskinesia and the Ser9Gly polymorphism in the DRD3 gene: a meta analysis. *Schizophrenia Research* 83, 185–192.
- Barrett JC, Fry B, Maller J, Daly MJ (2005). Haploview: analysis and visualization of LD and haplotype maps. *Bioinformatics* 21, 263–265.
- Basile VS, Masellis M, Badri F, Paterson AD, Meltzer HY, Lieberman JA, Potkin SG (1999). Association of the MscI polymorphism of the dopamine D3 receptor gene with tardive dyskinesia in schizophrenia. *Neuropsychopharmacology* 21, 17–27.
- Basile VS, Ozdemir V, Masellis M, Meltzer HY, Lieberman JA, Potkin SG, Macciardi FM, Petronis A, Kennedy JL (2001). Lack of association between serotonin-2A receptor gene (HTR2A) polymorphisms and tardive dyskinesia in schizophrenia. *Molecular Psychiatry* 6, 230–234.
- Beasley Jr. CM, Dellva M, Tamura RN, Morgenstern H, Glazer WM, Ferguson K, Tollefson GD (1999). Randomized double-blind comparison of the incidence of tardive dyskinesia in patients with schizophrenia during long-term treatment with olanzapine or haloperidol. *British Journal of Psychiatry* 174, 23–30.
- Breen G, Brown J, Maude S, Fox H, Collier D, Li T, Arranz M, Shaw D, St. Clair D (1999). –141C Del/Ins polymorphism of the dopamine receptor 2 gene is associated with schizophrenia in a British population. *American Journal of Medical Genetics* 88, 407–410.
- Casey DE (2000). Tardive dyskinesia: pathophysiology and animal models. *Journal of Clinical Psychiatry* 6 (Suppl. 4), 5–9.
- Centonze D, Gubellini P, Usiello A, Rossi S, Tschertner A, Bracci E, Erbs E, Tognazzi N, Bernardi G, Pisani A, et al. (2004). Differential contribution of dopamine D2S and D2L receptors in the modulation of glutamate and GABA transmission in the striatum. *Neuroscience* 129, 157–166.
- Chakos MH, Lieberman JA, Bilder RM, Borenstein M, Lerner G, Bogerts B, Wu H, Kinon B, Ashtari M (1994). Increase in caudate nuclei volumes of first-episode schizophrenic patients taking antipsychotic drugs. *American Journal of Psychiatry* 151, 1430–1436.
- Chen CH, Wei FC, Koong FJ, Hsiao KJ (1997). Association of TaqIA polymorphism of dopamine D2 receptor gene and tardive dyskinesia in schizophrenia. *Biological Psychiatry* 41, 827–829.
- Chong SA, Tan EC, Tan CH, Mythily CH, Chan YH (2003). Polymorphisms of dopamine receptors and tardive dyskinesia among Chinese patients with schizophrenia. *American Journal of Medical Genetics* 116B, 51–54.
- Corson PW, Nopoulos P, Miller DD, Arndt S, Andreasen NC (1999). Changes in basal ganglia volume over 2 years in patients with schizophrenia: typical vs. atypical neuroleptics. *American Journal of Psychiatry* 156, 1200–1204.
- De Leon J, Susce MT, Pan R-M, Koch WH, Wedlund PJ (2005). Polymorphic variations in GSTM1, GSTT1, PgP, CYP2D6, CYP3A5, and Dopamine D2 and D3 receptors and their association with tardive dyskinesia in severe mental illness. *Journal of Clinical Psychopharmacology* 25, 448–456.
- Duan J, Wainwright MS, Comeron JM, Saitou N, Sanders AR, Gelernter J, Gejman PV (2003). Synonymous mutations in the human dopamine receptor D2 (DRD2) affect mRNA stability and synthesis of the receptor. *Human Molecular Genetics* 12, 205–216.
- Dubertret C, Gorwood P, Guoya L, Deybach JC, Adès J (2001). Association and excess of transmission of a DRD2 haplotype in a sample of French schizophrenic patients. *Schizophrenia Research* 49, 203–212.
- Dudbridge F (2003). Pedigree disequilibrium tests for multilocus haplotypes. *Genetic Epidemiology* 25, 115–121.
- Egan MF, Apud J, Wyatt RJ (1997). Treatment of tardive dyskinesia. *Schizophrenia Bulletin* 23, 583–609.
- Flanagan JM, Pependikyte V, Pozdniakovaite N, Sobolev M, Assadzadeh A, Schumacher A, Zangeneh M, Lau L, Virtanen C, Wang S, Petronis A (2006). Intra- and interindividual epigenetic variation in human germ cells. *American Journal of Human Genetics* 79, 67–84.
- Gabriel SB, Schaffner SF, Nguyen H, Moore JM, Roy J, Blumenstiel B, Higgins J, DeFelice M, Lochner A, Faggart M, et al. (2002). The structure of haplotype blocks in the human genome. *Science* 296, 2225–2229.
- Gao X, Sakai K, Tamminga CA (1998). Chronic olanzapine or sertindole treatment results in reduced oral chewing movements in rats compared to haloperidol. *Neuropsychopharmacology* 19, 428–433.
- Garcia-Barcelo MM, Lam LCW, Ungvari GS, Lam VKL, Tang WK (2001). Dopamine D3 receptor gene and tardive dyskinesia in Chinese schizophrenic patients. *Journal of Neural Transmission* 108, 671–677.
- Gerlach J (2002). Improving outcome in schizophrenia: the potential importance of EPS and neuroleptic dysphoria. *Annals Clinical Psychiatry* 14, 47–57.
- Gerlach J, Casey DE (1988). Tardive dyskinesia. *Acta Psychiatrica Scandinavica* 77, 369–378.
- Glantz SA (1992). Primer of Biostatistics: the program, version 3.01. New York, NY: McGraw-Hill Inc.
- Glazer WM (2000). Extrapyramidal side effects, tardive dyskinesia, and the concept of atypicality. *Journal of Clinical Psychiatry* 61 (Suppl. 3), 16–21.
- Golimbet VE, Aksenova MG, Abramova LI, Kaleda VG, Orlova VA, Braga EA, Nosikov VV, Trubnikov VI (1998). Association of allelic DRD2 dopamine receptor gene polymorphism with mental diseases of schizophrenic

- spectrum and affective disorders. *Zhurnal nevroptologii i psikiatrii imeni S.S. Korsakova* 98, 32–35.
- Gunne LM, Haggstrom JE, Sjoquist B** (1984). Association with persistent neuroleptic-induced dyskinesia of regional changes in brain GABA synthesis. *Nature* 309, 347–349.
- Guy W** (1976). *ECDEU Assessment Manual for Psychopharmacology* (revised edn). Washington, DC: Department of Health, Education and Welfare.
- Hall H, Sedvall G, Magnusson O, Kopp J, Halldin C, Farde L** (1994). Distribution of D1- and D2-dopamine receptors, and dopamine and its metabolites in the human brain. *Neuropsychopharmacology* 11, 245–256.
- Hirvonen M, Laakso A, Nagren K, Rinne JO, Pohjalainen T, Hietala J** (2004). C957T polymorphism of the dopamine D2 receptor (DRD2) gene affects striatal DRD2 availability in vivo. *Molecular Psychiatry* 9, 1060–1061.
- Hori H, Ohmori O, Shinkai T, Kojima H, Okano C, Suzuki T, Nakamura J** (2000). Manganese superoxide dismutase gene polymorphism and schizophrenia: relation to tardive dyskinesia. *Neuropsychopharmacology* 23, 170–177.
- Hori H, Ohmori O, Shinkai T, Kojima H, Nakamura J** (2001a). Association analysis between two functional dopamine D2 receptor gene polymorphisms and schizophrenia. *American Journal of Medical Genetics* 105, 176–178.
- Hori H, Ohmori O, Shinkai T, Kojima H, Nakamura J** (2001b). Association between three functional polymorphisms of dopamine D2 receptor gene and tardive dyskinesia in schizophrenia. *American Journal of Medical Genetics* 105, 774–778.
- Hwang R, Shinkai T, Deluca V, Mueller DJ, Ni X, Macciardi F, Potkin S, Lieberman JA, Meltzer HY, Kennedy JL** (2005). Association study of 12 polymorphisms spanning the dopamine D2 receptor gene and clozapine treatment response in two treatment refractory/intolerant populations. *Psychopharmacology (Berlin)*. Published online: 14 April 2005. doi:10.1007/s00213-005-2223-5.
- Inada T, Arinami T, Yagi G** (1999). Association between a polymorphism in the promoter region of the dopamine D2 receptor gene and schizophrenia in Japanese subjects: replication and evaluation for antipsychotic-related features. *International Journal of Neuropsychopharmacology* 2, 181–186.
- Inada T, Dobashi I, Sugita T, Inagaki A, Kitao Y, Matsuda G, Kato S, Takano T, Yagi G, Asai M** (1997). Search for susceptibility locus to tardive dyskinesia. *Human Psychopharmacology* 12, 35–39.
- Jeste DV** (2000). Tardive dyskinesia in older patients. *Journal of Clinical Psychiatry* 61 (Suppl. 4), 27–32.
- Jeste DV, Lacro JP, Bailey A, Rockwell E, Harris MJ, Caligiuri MP** (1999b). Lower incidence of tardive dyskinesia with risperidone compared with haloperidol in older patients. *Journal of American Geriatric Society* 47, 716–719.
- Jeste DV, Rockwell E, Harris MG, Lohr JB, Lacro J** (1999a). Conventional vs. newer antipsychotics in elderly patients. *American Journal of Geriatric Psychiatry* 7, 70–76.
- Johansson P, Casey DE, Gunne LM** (1986). Dose-dependent increases in rat spontaneous chewing rates during long-term administration of haloperidol but not clozapine. *Psychopharmacology Bulletin* 22, 1017–1019.
- Jönsson EG, Nothen MM, Grunhage F, Farde L, Nakashima Y, Propping P, Sedvall GC** (1999a). Polymorphisms in the dopamine D2 receptor gene and their relationships to striatal dopamine receptor density of healthy volunteers. *Molecular Psychiatry* 4, 290–296.
- Jönsson EG, Nothen MM, Neidt H, Forslund K, Matila-Evenden M, Asberg M, Propping P, Sedvall GC** (1999b). Association between a promoter polymorphism in the dopamine D2 receptor gene and schizophrenia. *Schizophrenia Research* 40, 31–36.
- Kaiser R, Tremblay PB, Klufmoller F, Roots I, Brockmoller J** (2002). Relationship between adverse effects of antipsychotic treatment and dopamine D2 receptor polymorphisms in patients with schizophrenia. *Molecular Psychiatry* 7, 695–705.
- Kane JM, Woerner M, Lieberman J** (1988). Epidemiological aspects of tardive dyskinesia. *L'Encephale* 14S, 191–194.
- Kane JM, Woerner MG, Pollack S, Safferman AZ, Lieberman JA** (1993). Does clozapine cause tardive dyskinesia? *Journal of Clinical Psychiatry* 54, 327–330.
- Klawans HL, Goetz CG, Perlik S** (1980). Tardive dyskinesia: review and update. *American Journal of Psychiatry* 137, 900–908.
- Lahiri DK, Nurnburger Jr. JI** (1991). A rapid non-enzymatic method for the preparation of HMV DNA from blood for RFLP analysis. *Nucleic Acids Research* 19, 5444.
- Laruelle M, Gelernter J, Innis RB** (1998). D2 receptors binding potential is not affected by Taq1 polymorphism at the D2 receptor gene. *Molecular Psychiatry* 3, 261–265.
- Lattuada E, Cavallaro R, Serretti A, Lorenzi C, Smeraldi E** (2004). Tardive dyskinesia and DRD2, DRD3, DRD4, 5-HT2A variants in schizophrenia: an association study with repeated assessment. *International Journal of Neuropsychopharmacology* 7, 1–5.
- Lerer B, Segman RH, Fangerau H, Daly AK, Basile VS, Cavallaro R, Aschauer HN, McCreadie RG, Ohlraun S, Ferrier N, et al.** (2002). Pharmacogenetics of tardive dyskinesia: combined analysis of 780 patients supports association with dopamine D3 receptor gene Ser9Gly polymorphism. *Neuropsychopharmacology* 27, 105–119.
- Liao DL, Yeh YC, Chen HM, Chen H, Hong CJ, Tsai SJ** (2001). Association between the Ser9Gly polymorphism of the dopamine D3 receptor gene and tardive dyskinesia in schizophrenic patients. *Neuropsychobiology* 44, 95–98.
- Lovlie R, Daly AK, Blennerhassett R, Ferrier N, Steen VM** (2000). Homozygosity for the Gly-9 variant of the dopamine D3 receptor and risk for tardive dyskinesia in schizophrenic patients. *International Journal of Neuropsychopharmacology* 3, 61–65.
- Marsalek M** (2000). Tardive drug-induced extrapyramidal syndromes. *Pharmacopsychiatry* 33 (S1), 14–33.
- Meltzer HY, Li Z, Kaneda Y, Ichikawa J** (2003). Serotonin receptors: their key role in drugs to treat schizophrenia.

- Progress in Neuropsychopharmacology and Biological Psychiatry* 27, 1159–1172.
- Menza MA, Grossman N, Van Horn M, Cody R, Forman N** (1991). Smoking and movement disorders in psychiatric patients. *Biological Psychiatry* 30, 109–115.
- Morgenstern H, Glazer WM** (1993). Identifying risk factors for tardive dyskinesia among long-term outpatients maintained with neuroleptic medications. Results of the Yale Tardive Dyskinesia Study. *Archives of General Psychiatry* 50, 723–733.
- Morgenstern H, Glazer WM, Gibowski LD, Holmberg S** (1987). Predictors of tardive dyskinesia: results of a cross-sectional study in an outpatient population. *Journal of Chronic Diseases* 40, 319–327.
- Müller DJ, Schulze TG, Knapp M, Held T, Krauss H, Weber T, Ahle G, Maroldt A, Alfter D, Maier W, et al.** (2001). Familial occurrence of tardive dyskinesia. *Acta Psychiatrica Scandinavica* 104, 375–379.
- Müller DJ, Shinkai T, De Luca V, Kennedy JL** (2004). Clinical implications of pharmacogenomics for tardive dyskinesia. *Pharmacogenomics Journal* 4, 77–87.
- Neville MJ, Johnstone EC, Walton RT** (2004). Identification and characterization of ANKK1: a novel kinase gene closely linked to DRD2 on chromosome band 11q23.1. *Human Mutation* 23, 540–545.
- Noble EP, Blum K, Ritchie T, Montgomery A, Sheridan PJ** (1991). Allelic association of the D2 dopamine receptor gene with receptor-binding characteristics in alcoholism. *Archives of General Psychiatry* 48, 648–654.
- Nyholt DR** (2004). A simple correction for multiple testing for single-nucleotide polymorphisms in linkage disequilibrium with each other. *American Journal of Human Genetics* 74, 765–769.
- Oliveira AA, Kiefer MW, Manley NK** (1990). Tardive dyskinesia in psychiatric patients with substance use disorders. *American Journal of Drug and Alcohol Abuse* 16, 57–66.
- Perkins DO, Jeffries C, Sullivan P** (2005). Expanding the ‘central dogma’: the regulatory role of nonprotein coding genes and implications for the genetic liability to schizophrenia. *Molecular Psychiatry* 10, 69–78.
- Pohjalainen T, Rinne JO, Nagren K, Lehtikoinen P, Anttila K, Syvalahti EKG, Hietala J** (1998). The A1 allele of the human D2 dopamine receptor gene predicts low D2 receptor availability in healthy volunteers. *Molecular Psychiatry* 3, 256–260.
- Popendikyte V, Laurinavicius A, Paterson AD, Macciardi F, Kennedy JL, Petronis A** (1999). DNA methylation at the putative promoter region of the human dopamine D2 receptor gene. *Neuroreport* 10, 1249–1255.
- Ritchie T, Noble EP** (2003). Association of seven polymorphisms of the D2 dopamine receptor gene with brain receptor-binding characteristics. *Neurochemical Research* 28, 73–82.
- Schooler NR, Kane JM** (1982). Research diagnoses for tardive dyskinesia. *Archives of General Psychiatry* 39, 486–487.
- Schulze TG, Schumacher J, Müller DJ, Krauss H, Alfter D, Maroldt A, Ahle G, Maroldt A-O, Fernandez AN, Weber T, et al.** (2001). Lack of association between a functional polymorphism of the cytochrome P450 1A2 (CYP1A2) gene and tardive dyskinesia in schizophrenia. *American Journal of Medical Genetics* 105, 498–501.
- Schwartz J-C, Diaz J, Pilon C, Sokoloff P** (2000). Possible implications of the dopamine D3 receptor in schizophrenia and in antipsychotic drug actions. *Brain Research Reviews* 31, 277–287.
- Segman R, Neeman T, Heresco-Levy U, Finkel B, Karagichev L, Schlafman M, Dorevitch A, Yakir A, Lerner A, Shelevoy A, Lerer B** (1999). Genotypic association between the dopamine D3 receptor and tardive dyskinesia in chronic schizophrenia. *Molecular Psychiatry* 4, 247–253.
- Segman RH, Heresco-Levy U, Finkel B, Inbar R, Neeman T, Schlafman M, Dorevitch A, Yakir A, Lerner A, Shelevoy A, Lerer B** (2000). Association between the serotonin 2C receptor gene and tardive dyskinesia in chronic schizophrenia: additive contribution of 5-HT2Cser and DRD3gly alleles to susceptibility. *Psychopharmacology* 152, 408–413.
- Segman RH, Heresco-Levy U, Finkel B, Goltser T, Shalem R, Schlafman M, Dorevitch A, Yakir A, Greenberg D, Lerner A, Lerer B** (2001). Association between the serotonin 2A receptor gene and tardive dyskinesia in chronic schizophrenia. *Molecular Psychiatry* 6, 225–229.
- Segman RH, Goltser T, Heresco-Levy U, Finkel B, Shalem R, Schlafman M, Yakir A, Greenberg D, Strous R, Lerner A, Shelevoy A, Lerer B** (2003). Association of dopaminergic and serotonergic genes with tardive dyskinesia in patients with chronic schizophrenia. *Pharmacogenomics Journal* 3, 277–283.
- Shale H, Tanner C** (1996). Pharmacological options for the management of dyskinesia. *Drugs* 52, 849–860.
- Smith JM, Dunn DD** (1979). Sex differences in the prevalence of severe tardive dyskinesia. *American Journal of Psychiatry* 136, 1080–1082.
- Srivastava V, Varma PG, Prasad S, Semwal P, Nimgaonkar VL, Lerer B, Deshpande SN, Thelma BK** (2006). Genetic susceptibility to tardive dyskinesia among schizophrenia subjects: IV. Role of dopaminergic pathway gene polymorphisms. *Pharmacogenetics and Genomics* 16, 111–117.
- SPSS** (2000). SPSS for Windows, Release 10.0.7. SPSS Inc., Chicago.
- Steen VM, Lovlie R, MacEwan T, McCreadie RG** (1997). Dopamine D3-receptor gene variant and susceptibility to tardive dyskinesia in schizophrenic patients. *Molecular Psychiatry* 2, 139–145.
- Stober G, Jatzke S, Heils A, Jungkunz G, Knapp M, Mossner R, Riederer P, Lesch KP** (1998). Insertion/deletion variant (–141C Ins/Del) in the 5′ regulatory region of the dopamine D2 receptor gene: lack of association with schizophrenia and bipolar affective disorder. *Journal of Neural Transmission* 105, 101–109.

- Suzuki A, Mihara K, Kondo T, Tanaka O, Nagashima U, Otani K, Kaneko S** (2000). The relationship between dopamine D2 receptor polymorphism at the Taq1A locus and therapeutic response to nemonapride, a selective dopamine antagonist, in schizophrenic patients. *Pharmacogenetics* 10, 335–341.
- Tallerico T, Ulpian C, Liu ISC** (1999). Dopamine D2 receptor promoter polymorphism: no association with schizophrenia. *Psychiatry Research* 85, 215–219.
- Tan E-C, Chong SA, Mahendran R, Dong F, Tan C-H** (2001). Susceptibility to neuroleptic-induced tardive dyskinesia and the T102C polymorphism in the serotonin type 2A receptor. *Biological Psychiatry* 144, 147–150.
- Tarsy D, Baldessarini RJ** (1977). The pathophysiologic basis of tardive dyskinesia. *Biological Psychiatry* 12, 431–450.
- Tarsy D, Baldessarini RJ** (2006). Epidemiology of tardive dyskinesia: is risk declining with modern antipsychotics? *Movement Disorders*. Published online: 10 March 2006. doi:10.1002/mds.20823.
- Thompson J, Thomas N, Singleton A, Piggott M, Lloyd S, Perry EK, Morris CM, Perry RH, Ferrier IN, Court JA** (1997). D2 dopamine receptor gene (DRD2) Taq1A polymorphism: reduced dopamine D2 receptor binding in the human striatum associated with the A1 allele. *Pharmacogenetics* 7, 479–484.
- Usiello A, Baik JH, Rouge-Pont F, Picetti R, Dierich A, LeMeur M, Piazza PV, Borrelli E** (2000). Distinct functions of the two isoforms of dopamine D2 receptors. *Nature* 408, 199–203.
- Van Os J, Fahy T, Jones P, Harvey I, Toone B, Murray R** (1997). Tardive dyskinesia: who is at risk? *Acta Psychiatrica Scandinavica* 96, 206–216.
- Woerner MG, Alvir JMJ, Saltz BL, Lieberman JA, Kane JM** (1998). Prospective study of tardive dyskinesia in the elderly: rates and risk factors. *American Journal of Psychiatry* 155, 1521–1528.
